# Supplementary material
Source: publisher site journal article supplement (https://www.dovepress.com/article/385026)
Supplement: Supplementary file 1 [file get_supplementary_file.php]

Table S1. TERT promoter mutations with clinical characteristics in HCC patients

| Case No. | TERT Promoter Mutation | HBV | HCV | Sex(M/F) | Age at Diagnosis,y | ES stage | MVI stage |
| --- | --- | --- | --- | --- | --- | --- | --- |
| HCC1 | C228T | Y | N | M | 63 | III | M1 |
| HCC2 | wt | N | N | F | 49 | II-III | M0 |
| HCC3 | C228T | Y | N | M | 50 | III-IV | M0 |
| HCC4 | wt | N | N | M | 68 | II | M0 |
| HCC5 | wt | Y | N | M | 44 | III | M1 |
| HCC6 | wt | Y | N | M | 41 | II | M0 |
| HCC7 | C228T | Y | N | M | 67 | II | M2 |
| HCC8 | C228T | N | N | M | 71 | I-II | M1 |
| HCC9 | C228T | Y | N | M | 65 | II-III | M0 |
| HCC10 | wt | Y | N | M | 31 | I-III | M0 |
| HCC11 | wt | Y | N | F | 55 | II-III | M1 |
| HCC12 | wt | Y | N | M | 53 | II | M1 |
| HCC13 | wt | Y | N | M | 63 | II | M0 |
| HCC14 | wt | Y | N | M | 54 | II | M1 |
| HCC15 | C228T | Y | N | M | 41 | III | M0 |
| HCC16 | wt | Y | N | M | 49 | III | M1 |
| HCC17 | wt | Y | N | M | 63 | III | M2 |
| HCC18 | wt | N | N | M | 51 | I-II | M0 |
| HCC19 | C250T | Y | N | M | 50 | II | M0 |
| HCC20 | wt | Y | N | M | 53 | II-III | M0 |
| HCC21 | wt | Y | N | M | 74 | II | M0 |
| HCC22 | wt | Y | N | M | 63 | III | M0 |

Table S2. Primers used in qPCR

| Primer name | Sequence (5'to3') |
| --- | --- |
| circ_0021412 F | CTGCTTTCCTTCCTGTGCC |
| circ_0021412 R | GATCCTCCTGACACTCCTGG |
| U6 | CTCGCTTCGGCAGCACA |
| miR-29b-1-5p | GCTGGTTTCATATGGTGGTTTAGA |
| miR-4699-5p | AGAAGATTGCAGAGTAAGTTCC |
| miR-199a-5p | CCCAGTGTTCAGACTACCTGTTC |
| REG3A F | AGCTACTCATACGTCTGGATTGG |
| REG3A R | CACCTCAGAAATGCTGTGCTT |
| SFRP5 F | AGGAGTACGACTACTATGGCTG |
| SFRP5 R | GGTCGGCAGGGATGTCAAG |
| GSTM1 F | GGACGCCTTCCCAAATCTGA |
| GSTM1 R | GCTGAGTATGGGCTCCTCAC |
| AL360169.3-201 F | TGTGATGTCATGCCCAGAGG |
| AL360169.3-201 R | TTGACTGGTCTGGCACATGG |
| LINC02672-203 F | AAGCATGTGCACCTCTCCTC |
| LINC02672-203 R | GGCAAGATGATGGGTTCCCA |
| GAPDH F | ACAACTTTGGTATCGTGGAAGG |
| GAPDH R | GCCATCACGCCACAGTTTC |

Table S3. Down-regulated lncRNA-up-regulated miRNA-down-regulated mRNA

| lncRNA | miRNA | mRNA |
| --- | --- | --- |
| PAPLN-209,LINC576,AC000032.1-201 | hsa-miR-378f | GGT5 |
| GGT1-230,XIST-218,AC080038.1-204, ALOX5-203,XIST-219,FRMD6-218, GEM-203,RASGRP2-218,SVEP1-204, SLC5A1-202 | hsa-miR-29a-3p | LAMA2 |
| RGS7BP-203,XIST-219,SVEP1-204, MEG3-210,XIST-218 | hsa-miR-1285-5p | CCDC80 |
| PLA2G2A-204,PTPRS-206,XIST-218, WNK2-213,XIST-219,ALOX5-203, SDS-203,PLA2G2A-207 | hsa-miR-193b-3p | CACNA1D,CLIC1 |
| TTYH1-212,TTYH1-215,ITGB8-204, PTPRS-206,WNK2-213,RGS7BP-203, PAPLN-209,XIST-219,SVEP1-204 | hsa-miR-210-5p | DBNL,PTPA,PDE2A,PRELP,NSD1,SERPINF2, COL14A1,SCARF2,CTSD,LAMC3,TNRC18, SNX11,EPHB3,C1orf116 |
| RASGRP2-218,XIST-219,MDM4-209, MEG3-210,AC080038.1-204, CYP3A7-202,PTPRS-206,AC000032.1- 201,XIST-218,PAPLN-209,TTYH1-215 | hsa-miR-7974 | FGFR3,LRRC8A,GTF3C5,CXCL14,CYFIP2, PIK3IP1,BGN,SEC14L2,ELAC2,SERPINF2, AP1M2,LAMC3,IGLL5,HIST2H4A,ITSN2, LSP1,BSG,PDE2A |
| PTPRS-206,PTGDS-201,GGT1-230, XIST-218,AC080038.1-204,MEG3-210, TTYH1-215,RASGRP2-218,LINC576, LINC575,IGLL5-AS1,GSTM1-208 | hsa-miR-1260b | TPI1,TTC8,MZB1,SNX11,CLDN7,CLPTM1L, TMSB4X,CLIC1,GSTM1,CAMKK2 |
| PTGDS-201,ITGB8-204,XIST-218, GGT1-230,MEG3-210,MDM4-209, FRMD6-218,XIST-219,PTGDS-209 | hsa-miR-5589-3p | BPIFA1,ADORA2A,SEC14L1 |
| XIST-218,MDM4-209,PAPLN-209, XIST-219,FRMD6-218,SVEP1-204 | hsa-miR-29a-5p | EIF2A |
| XIST-219,LINC783,XIST-218 | hsa-miR-1303 | COPA,NABP1,MGP,MAGT1 |
| WNK2-213,SDS-203,SDS-202,MDM4-209, MEG3-210,MFAP4-204,PAPLN-209, FRMD6-218,PLA2G2A-207, AL445205.1-201,TTYH1-215, FGFR2-219,HLA-DQB1-207,GGT1-230 | hsa-miR-1285-3p | LAMC3,KMO,MDM4,SBSPON,SCAP,GSTM1, ZNF284,SLC34A2,STK4,PRELP,MYRIP, PLAC8,C7,HAPLN3,TPI1,MPC2 |
| FRMD6-218,PAPLN-209,AC080038.1-  204,MDM4-209,XIST-218 | hsa-miR-193b-5p | GSTM1,IGLL5,TBC1D5,MLF2 |
| IGLL5-AS1,SVEP1-204,XIST-219, XIST-218,MDM4-209,PLA2G2A-207, AL445205.1-201 | hsa-miR-1972 | CBSL,SDS,CHST4,ACBD5,LCK,ADORA2A, SIKE1,ROCK2,SLCO1B3,CAMKK2,PODN, IGF2,DBNL,EPN2,PDE2A,EMILIN1,SCARB2, CTSD,TCN2,PRR13,PITPNM3,SBSPON, ZFAND5,EPHB3,SPINT2,IGLL5,ATP2A3 |
| TTYH1-215,TTYH1-217,GEM-203, PAPLN-209,FRMD6-218,MDM4-209, MEG3-210,XIST-218,SVEP1-204, RASGRP2-218 | hsa-miR-34a-5p | TNRC18,FOS,KLRK1,STAB2,SERPINF2, PGM1,CDKN1C,STMN3,FXYD2 |
| XIST-218,MEG3-210,MDM4-209, FRMD6-218,LINC576,XIST-219, PTGDS-209,SLC5A1-202 | hsa-miR-7-5p | SELENOW |
| FGFR2-219,ITGB8-204,GGT1-230, FRMD6-218,PTGDS-201,AC000032.1- 201,PTGDS-209 | hsa-miR-29b-1-5p | THBS2 |
| WNK2-213,PAPLN-209 | hsa-miR-365a-5p | IGF2,FXYD3 |
| MEG3-210,CYP3A7-202,PTPRS-206, XIST-218,SLC5A1-202,XIST-219, AL445205.1-201,GGT1-230,PAPLN-209, FRMD6-218 | hsa-miR-378g | APOC4,CCNB1IP1,HDAC6 |
| AC000032.1-201,PAPLN-209,LINC576 | hsa-miR-378i | GGT5 |
| GGT1-230,PAPLN-209,ALOX5-203, FRMD6-218,XIST-218,PTPRS-206, MDM4-209,SVEP1-204,RASGRP2-218, SDS-203,XIST-219 | hsa-miR-671-5p | AATK,SIPA1L1,CD79A,CBSL,CCL19, PIK3IP1,PTBP1,RPL10,ATP8A1,STMN3, CCL5,DBNL,GPR88,HAPLN3,ADCY5,LMNA, MAX,SCARA5,SFRP5,SYNE1,AC008763.3, URGCP,MKNK2,SLC34A2,EMID1,ATP2A3, ABHD14A-ACY1,LAMC3,TNRC18,AP1M2, PAPLN,PITPNM3 |

Table S4. Up-regulated lncRNA-down-regulated miRNA-up-regulated mRNA

| lncRNA | miRNA | mRNA |
| --- | --- | --- |
| SSUH2-215,FAM245B-203,LINC2101, CYP17A1-208 | hsa-miR-214-3p | STAT2,ITPK1,PNPLA6,CCNK,CORO7,CD151,  AP2B1,PEMT,PACSIN2,SH3GL1,ARID1B,  SERPING1,HNF1A,MAP3K4,SSBP3 |
| DCST1-AS1-201,CYP17A1-208 | hsa-miR-450a-2-3p | MMS19,MRPL37,ZNF219 |
| SSUH2-215,LINC2101,AC135050.6-202, | hsa-miR-130a-3p | PNPLA6 |
| AL360169.3-201,DCST1-AS1-201, AC125257.1-201,AC004233.2-201 | hsa-miR-146a-5p | ADM |
| LINC2101,SSUH2-215 | hsa-miR-1286 | JPT2 |
| AL360169.3-201,SSUH2-215 | hsa-miR-125a-5p | HTATIP2,STAT2,PEMT,KXD1,CORO7,ZNF219,  TMEM101 |
| CYP17A1-208 | hsa-miR-519c-5p | ADM |
| LINC1462,LINC1476 | hsa-miR-708-3p | SEPT8 |
| LINC2101,AC004233.2-201, AC125257.1-201,SSUH2-215 | hsa-miR-708-5p | SLC13A5,ARFGAP2 |
| SSUH2-215 | hsa-miR-31-5p | CORO7 |
| AL360169.3-201,AC125257.1-201, DCST1-AS1-201,CDK5RAP2-OT1, AC004233.2-201 | hsa-miR-3059-5p | SSBP3,ZFYVE27,SLC22A12,CCNYL1,XPO1,  CLTA |
| AC125257.1-201 | hsa-miR-495-3p | SLC39A14 |

Table S5. Down-regulated circRNA-up-regulated miRNA-down-regulated mRNA

| circRNA | miRNA | mRNA |
| --- | --- | --- |
| novel_circ_0007186 | hsa-miR-378f | GGT5 |
| hsa_circ_0008952,novel_circ_0010234, novel_circ_0010219 | hsa-miR-29a-3p | LAMA2 |
| novel_circ_0009085 | hsa-miR-1285-3p | MPC2,MYRIP,SLC34A2,ZNF284,SCAP,  STK4,C7,PRELP,SBSPON,PLAC8,HAPLN3,  GSTM1,KMO,LAMC3,TPI1,MDM4 |
| novel_circ_0001877 | hsa-miR-29b-1-5p | THBS2 |
| hsa_circ_0084790 | hsa-miR-1285-5p | CCDC80 |
| hsa_circ_0003154,hsa_circ_0008952 | hsa-miR-1260b | CAMKK2,CLIC1,CLDN7,MZB1,CLPTM1L,  TTC8,SNX11,TMSB4X,TPI1,GSTM1 |
| hsa_circ_0084790 | hsa-miR-193b-3p | CACNA1D,CLIC1 |
| hsa_circ_0084790 | hsa-miR-378g | APOC4,CCNB1IP1,HDAC6 |
| hsa_circ_0008952 | hsa-miR-1303 | NABP1,MGP,MAGT1,COPA |
| novel_circ_0010233 | hsa-miR-1972 | SLCO1B3,EPHB3,PODN,ACBD5,EMILIN1,  EPN2,DBNL,SPINT2,SBSPON,CAMKK2,SDS,  ADORA2A,PRR13,CBSL,ZFAND5,CTSD,  CHST4,ROCK2,TCN2,IGLL5,IGF2,PDE2A,  PITPNM3,SCARB2,SIKE1,LCK,ATP2A3 |
| hsa_circ_0005875,hsa_circ_0084790 | hsa-miR-34a-5p | SERPINF2,CDKN1C,FOS,STMN3,TNRC18,  FXYD2,STAB2,KLRK1,PGM1 |
| novel_circ_0007186 | hsa-miR-378i | GGT5 |

Table S6. Up-regulated circRNA-down-regulated miRNA-up-regulated mRNA

| circRNA | miRNA | mRNA |
| --- | --- | --- |
| hsa_circ_0031584,hsa_circ_0013093 | hsa-miR-130a-3p | PNPLA6 |
| hsa_circ_0031584 | hsa-miR-652-3p | CHD4 |
| novel_circ_0007784,novel_circ_0009018, hsa_circ_0031584 | hsa-miR-31-5p | CORO7 |
| hsa_circ_0008150,hsa_circ_0007215 | hsa-miR-1286 | JPT2 |
| hsa_circ_0031584 | hsa-miR-324-5p | PNPLA6,GPX3,MAD2L2,ITPK1 |
| hsa_circ_0058528 | hsa-miR-708-5p | SLC13A5,ARFGAP2 |
| hsa_circ_0031584 | hsa-miR-214-3p | STAT2,CORO7,AP2B1,SH3GL1,CD151,MAP3K4,  SERPING1,CCNK,HNF1A,PACSIN2,ITPK1,  PNPLA6,ARID1B,PEMT,SSBP3 |
| novel_circ_0009018 | hsa-miR-504-5p | PPIE,STAT2,PLCB3 |
| hsa_circ_0013093,hsa_circ_0058528 | hsa-miR-450a-2-3p | MMS19,ZNF219,MRPL37 |
| novel_circ_0009018 | hsa-miR-125a-5p | ZNF219,TMEM101,HTATIP2,PEMT,CORO7,  STAT2,KXD1 |
| novel_circ_0011646,novel_circ_0009018 | hsa-miR-3059-5p | ZFYVE27,SLC22A12,CLTA,CCNYL1,SSBP3,  XPO1 |
